# Supplementary material
Source: PubMed Central journal article supplement (PMC3593878)

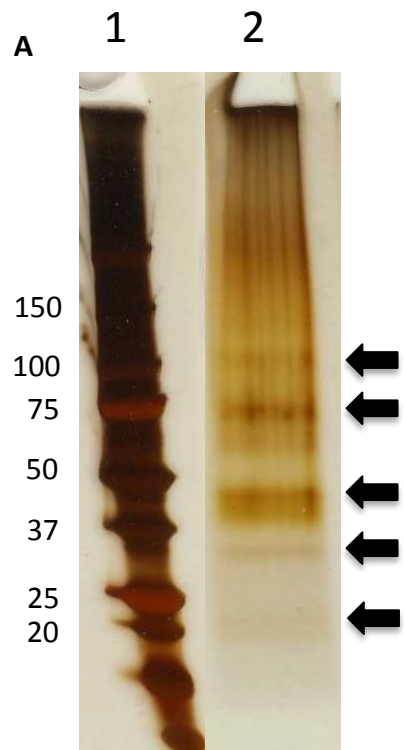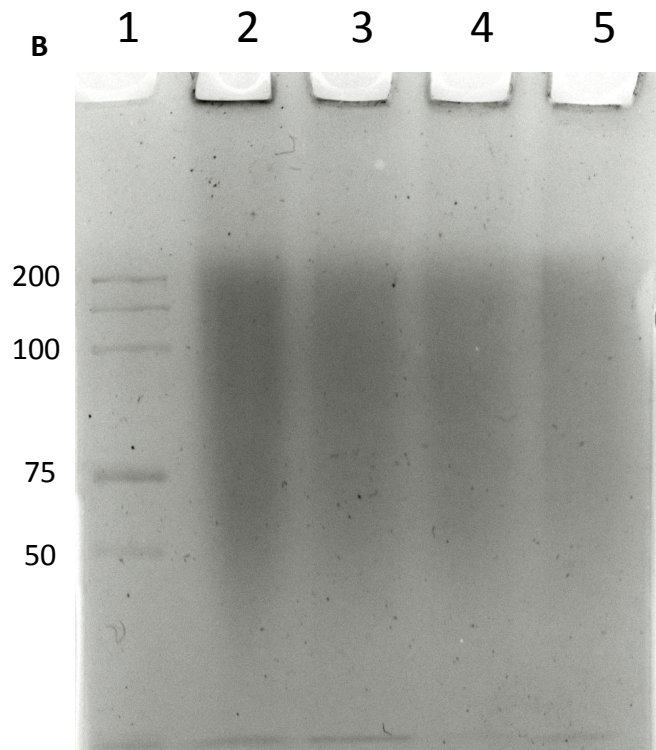

Supplement: 1301419110_sfig01.pdf [file 1301419110_sfig01.pdf]
